# Supplementary material for: Comprehensive characterization of pyroptosis phenotypes with distinct tumor immune profiles in gastric cancer to aid immunotherapy
Source: Aging (Albany NY). 2023 Aug 17;15(16):8113–36. doi: 10.18632/aging.204958 (PMC10497016; doi:10.18632/aging.204958)
Supplement: Supplementary Table 1 [file aging-15-204958-s002.xlsx]

## Sheet: Sheet1
Supplementary Table 1. Identification of three distinct pyroptosis phenotypes in gastric cancer.
ID	futime	fustat	Subtype
TCGA-D7-6822	375	0	A
TCGA-VQ-AA68	1328	0	A
TCGA-CD-8535	390	0	A
TCGA-BR-8487	34	0	A
TCGA-D7-A6EY	348	1	A
TCGA-CD-8533	468	0	A
TCGA-VQ-A8E0	562	1	A
TCGA-VQ-A8P5	235	1	A
TCGA-VQ-A94R	1294	1	A
TCGA-VQ-A8DU	166	1	A
TCGA-BR-8284	245	1	A
TCGA-CD-5799	396	0	A
TCGA-D7-8573	593	0	A
TCGA-HU-A4GP	273	0	A
TCGA-VQ-A8PU	832	1	A
TCGA-VQ-A91Y	296	1	A
TCGA-FP-8210	153	1	A
TCGA-VQ-AA69	864	0	A
TCGA-BR-7197	280	0	A
TCGA-BR-8295	67	1	A
TCGA-VQ-A8PQ	476	1	A
TCGA-FP-A8CX	7	0	A
TCGA-HU-A4HD	1016	0	A
TCGA-BR-6803	949	0	A
TCGA-BR-8058	1133	0	A
TCGA-BR-8364	675	0	A
TCGA-3M-AB46	1765	0	A
TCGA-RD-A8N0	1236	0	A
TCGA-B7-5818	356	0	A
TCGA-HU-A4GJ	650	0	A
TCGA-D7-8570	752	0	A
TCGA-B7-A5TJ	335	0	A
TCGA-BR-8296	474	1	A
TCGA-FP-8211	413	0	A
TCGA-D7-8574	523	0	A
TCGA-VQ-A94T	342	1	A
TCGA-FP-7916	428	1	A
TCGA-D7-A6EX	344	0	A
TCGA-VQ-A8PM	57	1	A
TCGA-D7-6818	376	1	A
TCGA-FP-8099	519	0	A
TCGA-BR-7704	1072	0	A
TCGA-BR-A44T	1038	0	A
TCGA-CG-4305	485	0	A
TCGA-BR-6801	1223	0	A
TCGA-D7-A748	132	1	A
TCGA-VQ-A91Z	1690	0	A
TCGA-D7-6519	625	0	A
TCGA-BR-6710	273	0	A
TCGA-KB-A93H	1145	0	A
TCGA-BR-6452	1055	0	A
TCGA-CG-4440	122	1	A
TCGA-BR-6458	588	1	A
TCGA-HU-A4G2	739	0	A
TCGA-HU-A4H0	64	0	A
TCGA-BR-A4J9	14	0	A
TCGA-BR-7722	466	1	A
TCGA-BR-6709	370	1	A
TCGA-HU-A4G3	170	0	A
TCGA-CD-A489	344	1	A
TCGA-CG-4466	577	0	A
TCGA-CD-5803	341	1	A
TCGA-VQ-A91V	1297	0	A
TCGA-CG-5717	212	1	A
TCGA-CD-8527	218	1	A
TCGA-HU-A4H5	724	0	A
TCGA-CD-5800	400	0	A
TCGA-IN-A6RL	406	1	A
TCGA-VQ-A8DT	1484	0	A
TCGA-CD-8524	388	0	A
TCGA-VQ-A94U	819	0	A
TCGA-RD-A8N6	272	1	A
TCGA-CG-5726	881	1	A
TCGA-BR-4267	188	1	A
TCGA-VQ-AA6F	1646	0	A
TCGA-KB-A6F7	1935	0	A
TCGA-BR-6707	605	1	A
TCGA-FP-A4BF	168	1	A
TCGA-CD-5798	408	0	A
TCGA-FP-7735	106	1	A
TCGA-BR-7715	1023	0	A
TCGA-IN-A7NU	356	0	A
TCGA-HU-A4H2	394	0	A
TCGA-CD-5801	401	1	A
TCGA-HU-A4GC	99	0	A
TCGA-VQ-AA64	560	1	A
TCGA-HU-A4GY	8	0	A
TCGA-BR-8369	427	0	A
TCGA-RD-A8NB	513	1	A
TCGA-D7-6527	312	1	A
TCGA-BR-8381	224	0	A
TCGA-D7-A4YX	1108	0	A
TCGA-RD-A8N1	3519	0	A
TCGA-CD-A486	192	1	A
TCGA-RD-A7BW	156	1	A
TCGA-RD-A7BS	336	1	A
TCGA-CG-4437	245	0	A
TCGA-R5-A7ZR	185	1	A
TCGA-IN-A6RJ	379	0	A
TCGA-D7-6520	573	0	A
TCGA-VQ-A8P8	942	0	A
TCGA-FP-8631	17	0	A
TCGA-CG-5721	183	0	A
TCGA-CD-8532	354	1	A
TCGA-BR-8676	229	0	A
TCGA-BR-8297	225	0	A
TCGA-VQ-A8P3	1132	0	A
TCGA-IN-A6RI	559	0	A
TCGA-VQ-AA6K	378	1	A
TCGA-IN-8663	103	1	A
TCGA-BR-8680	972	0	A
TCGA-BR-8687	250	1	A
TCGA-BR-7958	899	0	A
TCGA-VQ-AA6A	1184	0	A
TCGA-VQ-A8PC	1407	1	A
TCGA-CD-8525	383	0	A
TCGA-BR-8483	164	0	A
TCGA-CD-A4MG	200	1	A
TCGA-D7-A4YU	500	0	A
TCGA-BR-A4J5	862	0	A
TCGA-VQ-A8PJ	82	1	A
TCGA-CG-5722	30	0	A
TCGA-F1-A72C	346	0	A
TCGA-RD-A8N2	3540	0	A
TCGA-CG-4441	426	1	A
TCGA-D7-A4Z0	449	0	A
TCGA-D7-8578	643	0	A
TCGA-HU-A4H6	644	0	A
TCGA-IN-AB1V	479	0	A
TCGA-VQ-A91E	664	0	A
TCGA-BR-A4J6	20	0	A
TCGA-VQ-A925	138	1	A
TCGA-VQ-A8DV	403	1	A
TCGA-FP-7998	678	0	A
TCGA-VQ-A92D	2032	0	A
TCGA-IN-AB1X	411	0	A
TCGA-VQ-A91N	570	1	A
TCGA-RD-A8N9	1083	0	A
TCGA-BR-8590	284	1	A
TCGA-BR-6457	416	0	A
TCGA-VQ-A8PD	496	1	A
TCGA-IN-A7NR	198	0	A
TCGA-CG-4443	912	0	A
TCGA-KB-A93J	1124	0	A
TCGA-RD-A8MV	3720	0	A
TCGA-B7-A5TN	287	0	A
TCGA-SW-A7EA	579	0	A
TCGA-BR-8384	113	0	A
TCGA-HU-A4G8	690	0	A
TCGA-BR-8371	359	1	A
TCGA-D7-5577	782	1	A
TCGA-CG-5725	457	1	A
TCGA-CD-8528	375	0	A
TCGA-HU-A4G9	736	0	A
TCGA-BR-8289	81	1	A
TCGA-BR-A44U	422	1	A
TCGA-HU-A4H8	270	0	A
TCGA-FP-7829	594	0	A
TCGA-CD-A487	374	0	A
TCGA-IN-A6RN	594	0	A
TCGA-CG-5719	31	0	A
TCGA-CD-A48A	378	0	A
TCGA-D7-A747	255	1	A
TCGA-BR-8484	766	1	A
TCGA-BR-A4J8	411	0	A
TCGA-CD-8531	383	0	A
TCGA-BR-6564	794	1	A
TCGA-BR-8286	895	0	A
TCGA-HU-A4GH	358	0	A
TCGA-BR-8690	325	0	A
TCGA-B7-A5TI	595	0	A
TCGA-B7-A5TK	288	0	A
TCGA-D7-A74A	607	0	A
TCGA-BR-8367	801	1	A
TCGA-D7-A6F0	678	0	A
TCGA-CD-8534	367	0	A
TCGA-D7-8576	446	1	A
TCGA-VQ-A8PX	1964	0	A
GSM1523727	2661.9	1	A
GSM1523729	2646.9	1	A
GSM1523744	3171	1	A
GSM1523747	261	0	A
GSM1523748	3147.9	1	A
GSM1523765	426	0	A
GSM1523772	300.9	0	A
GSM1523776	2924.1	1	A
GSM1523780	492	0	A
GSM1523781	87.9	0	A
GSM1523784	2739	1	A
GSM1523785	353.1	0	A
GSM1523786	854.1	0	A
GSM1523787	2688.9	1	A
GSM1523788	248.1	0	A
GSM1523789	354	0	A
GSM1523792	2424	1	A
GSM1523797	848.1	0	A
GSM1523804	2301	1	A
GSM1523806	381	0	A
GSM1523809	2202.9	1	A
GSM1523813	2184.9	1	A
GSM1523815	755.1	0	A
GSM1523816	2162.1	1	A
GSM1523817	186.9	0	A
GSM1523818	294.9	0	A
GSM1523819	303	0	A
GSM1523825	120	0	A
GSM1523829	2094.9	1	A
GSM1523831	927	0	A
GSM1523832	530.1	0	A
GSM1523840	684.9	0	A
GSM1523841	1262.1	0	A
GSM1523842	1461.9	0	A
GSM1523843	776.1	0	A
GSM1523844	2067	1	A
GSM1523850	1092	0	A
GSM1523857	432.9	0	A
GSM1523862	630	0	A
GSM1523863	1937.1	1	A
GSM1523864	1919.1	1	A
GSM1523865	1911	1	A
GSM1523870	1874.1	1	A
GSM1523877	393	0	A
GSM1523878	1856.1	1	A
GSM1523881	447	0	A
GSM1523882	1821	1	A
GSM1523884	1812.9	1	A
GSM1523888	1797	1	A
GSM1523889	1790.1	1	A
GSM1523890	1787.1	1	A
GSM1523893	603	0	A
GSM1523895	1770.9	1	A
GSM1523896	840.9	0	A
GSM1523897	1766.1	1	A
GSM1523899	1742.1	1	A
GSM1523904	1661.1	1	A
GSM1523905	1659	1	A
GSM1523909	1635.9	1	A
GSM1523918	843.9	0	A
GSM1523919	2523	1	A
GSM1523920	279.9	0	A
GSM1523924	2466	1	A
GSM1523925	189	0	A
GSM1523926	2070.9	1	A
GSM1523931	2328	1	A
GSM1523934	384	0	A
GSM1523936	527.1	0	A
GSM1523937	590.1	0	A
GSM1523938	173.1	0	A
GSM1523939	336.9	0	A
GSM1523940	600.9	0	A
GSM1523943	165.9	0	A
GSM1523948	824.1	0	A
GSM1523951	1590.9	0	A
GSM1523952	3026.1	1	A
GSM1523953	2543.1	1	A
GSM1523955	1031.1	0	A
GSM1523957	3018.9	1	A
GSM1523960	2970	1	A
GSM1523961	285	0	A
GSM1523963	1373.1	0	A
GSM1523964	2955.9	1	A
GSM1523966	1554	0	A
GSM1523967	2954.1	1	A
GSM1523968	1355.1	0	A
GSM1523969	537	0	A
GSM1523970	471	0	A
GSM1523971	399	0	A
GSM1523973	2618.1	1	A
GSM1523974	2946.9	1	A
GSM1523975	216	0	A
GSM1523976	1680	0	A
GSM1523977	30	0	A
GSM1523986	2604	1	A
GSM1523987	548.1	0	A
GSM1523988	444.9	0	A
GSM1523989	2601	1	A
GSM1523990	425.1	0	A
GSM1523991	2856	1	A
GSM1523992	603.9	0	A
GSM1523994	2591.1	1	A
GSM1523995	191.1	0	A
GSM1523996	1056	0	A
GSM1523998	636.9	0	A
GSM1523999	2816.1	1	A
GSM1524001	2808.9	1	A
GSM1524004	177.9	0	A
GSM1524005	284.1	0	A
GSM1524008	324.9	0	A
GSM1524010	591	0	A
GSM1524011	2706	1	A
GSM1524015	746.1	0	A
GSM1524016	834	0	A
GSM1524017	2550.9	1	A
GSM1524018	2543.1	1	A
GSM1524019	249.9	0	A
GSM1524020	2529	1	A
GSM1524024	2682.9	0	A
GSM1524026	2508	1	A
GSM1524027	1791	0	A
GSM1524028	1431	0	A
GSM1524029	933	0	A
GSM1524030	939.9	0	A
GSM1524031	2460	1	A
GSM1524033	2424.9	1	A
GSM1524034	1322.1	0	A
GSM1524035	2409	1	A
GSM1524037	702.9	0	A
GSM1524046	2640.9	1	A
GSM1524047	2096.1	1	A
GSM1524048	1404	0	A
GSM1524049	2634	1	A
GSM1524050	1713.9	0	A
GSM1524052	395.1	0	A
GSM1524054	2597.1	1	A
GSM1524057	477.9	0	A
GSM1524061	2538	1	A
GSM1524062	2106	0	A
GSM1524068	2786.1	1	A
GSM1524069	2568	0	A
GSM1524070	2748.9	1	A
GSM1524071	2723.1	1	A
GSM1524072	1287.9	0	A
GSM387792	352	1	A
GSM387794	788	1	A
GSM387795	812	0	A
GSM387800	210	0	A
GSM387801	604	0	A
GSM387803	981	0	A
GSM387804	380	0	A
GSM387815	1888	0	A
GSM387818	3261	0	A
GSM387820	3897	0	A
GSM387821	3689	0	A
GSM387823	198	1	A
GSM387825	3765	0	A
GSM387826	332	0	A
GSM387830	2610	1	A
GSM387832	3766	0	A
GSM387833	256	1	A
GSM387837	1125	1	A
GSM387839	9	0	A
GSM387840	3878	0	A
GSM387842	514	1	A
GSM387843	68	1	A
GSM387851	326	1	A
GSM387854	13	0	A
GSM387855	3439	0	A
GSM387861	696	1	A
GSM387864	129	1	A
GSM387865	731	1	A
GSM387866	401	1	A
GSM387867	684	1	A
GSM387869	626	1	A
GSM387871	391	1	A
GSM387875	2661	0	A
GSM387876	755	1	A
GSM387878	706	0	A
GSM387879	936	1	A
GSM387880	2249	0	A
GSM387881	368	1	A
GSM387883	1275	0	A
GSM387884	296	1	A
GSM387888	1071	0	A
GSM387890	12	0	A
GSM387891	1937	0	A
GSM387892	239	1	A
GSM387896	299	1	A
GSM387897	729	0	A
GSM387899	353	1	A
GSM387901	2486	0	A
GSM387902	1787	1	A
GSM387903	1237	1	A
GSM387904	2230	0	A
GSM387905	188	1	A
GSM387906	390	0	A
GSM387907	1906	0	A
GSM387910	668	1	A
GSM387911	747	1	A
GSM387913	211	1	A
GSM387914	198	1	A
GSM387917	341	0	A
GSM387919	313	0	A
GSM387920	662	0	A
GSM387921	0	0	A
GSM387924	145	0	A
GSM387925	3709	1	A
GSM387926	97	0	A
GSM387938	192	1	A
GSM387939	4384	0	A
GSM387943	209	0	A
GSM387950	379	1	A
GSM387951	47	0	A
GSM387952	4009	0	A
GSM387953	258	0	A
GSM387958	2421	0	A
GSM387960	1579	1	A
GSM387963	10	0	A
GSM387964	317	1	A
GSM387966	900	0	A
GSM387967	4151	0	A
GSM387969	3397	0	A
GSM387975	445	1	A
GSM387978	1199	1	A
GSM387979	199	1	A
GSM387980	131	1	A
GSM387982	2266	0	A
GSM387985	3498	0	A
GSM387986	44	0	A
GSM387987	232	1	A
GSM2235556	2100	1	A
GSM2235557	690	1	A
GSM2235558	720	1	A
GSM2235559	1770	1	A
GSM2235560	360	1	A
GSM2235561	2550	0	A
GSM2235562	540	1	A
GSM2235563	420	1	A
GSM2235564	2520	0	A
GSM2235565	1950	1	A
GSM2235566	330	1	A
GSM2235567	1290	1	A
GSM2235568	2460	0	A
GSM2235570	2430	0	A
GSM2235572	2580	0	A
GSM2235573	2460	0	A
GSM2235575	2580	0	A
GSM2235576	120	1	A
GSM2235577	570	1	A
GSM2235578	630	1	A
GSM2235579	510	1	A
GSM2235580	750	1	A
GSM2235582	390	1	A
GSM2235585	690	1	A
GSM2235586	2310	0	A
GSM2235587	1920	1	A
GSM2235588	1530	1	A
GSM2235589	2310	0	A
GSM2235593	2310	0	A
GSM2235595	450	1	A
GSM2235596	2250	0	A
GSM2235599	2400	0	A
GSM2235602	2460	0	A
GSM2235603	2400	0	A
GSM2235604	2220	0	A
GSM2235605	2010	1	A
GSM2235606	2190	0	A
GSM2235609	240	1	A
GSM2235610	690	1	A
GSM2235611	240	1	A
GSM2235612	870	1	A
GSM2235616	30	1	A
GSM2235617	2130	0	A
GSM2235618	2130	0	A
GSM2235619	2100	0	A
GSM2235620	2130	0	A
GSM2235621	990	1	A
GSM2235622	690	1	A
GSM2235623	630	1	A
GSM2235625	2100	0	A
GSM2235630	2100	0	A
GSM2235631	2070	0	A
GSM2235632	2280	0	A
GSM2235633	510	1	A
GSM2235635	2160	0	A
GSM2235636	2070	0	A
GSM2235637	2040	0	A
GSM2235695	3630	0	A
GSM2235697	1170	1	A
GSM2235698	690	1	A
GSM2235700	3510	0	A
GSM2235702	540	1	A
GSM2235703	1290	1	A
GSM2235709	3240	0	A
GSM2235711	570	1	A
GSM2235712	3240	0	A
GSM2235713	3480	1	A
GSM2235715	3540	0	A
GSM2235720	3570	0	A
GSM2235721	3570	0	A
GSM2235722	1080	1	A
GSM2235723	3540	0	A
GSM2235726	30	1	A
GSM2235736	270	1	A
GSM2235741	3810	0	A
GSM2235742	90	1	A
GSM2235744	1470	1	A
GSM2235745	3180	0	A
GSM2235746	3330	0	A
GSM2235749	1170	1	A
GSM2235755	2610	1	A
GSM2235758	390	1	A
GSM2235760	600	1	A
GSM2235761	4020	0	A
GSM2235763	3270	1	A
GSM2235764	270	1	A
GSM2235770	210	1	A
GSM2235771	4290	0	A
GSM2235772	1800	1	A
GSM2235773	510	1	A
GSM2235774	360	1	A
GSM2235775	3600	0	A
GSM2235776	600	1	A
GSM2235777	3450	1	A
GSM2235778	690	1	A
GSM2235783	2250	1	A
GSM2235786	3240	0	A
GSM2235790	3570	0	A
GSM2235791	750	1	A
GSM2235799	360	1	A
GSM2235800	3420	0	A
GSM2235801	3390	0	A
GSM2235804	3420	0	A
GSM2235805	150	1	A
GSM2235806	3030	1	A
GSM2235808	690	1	A
GSM2235811	360	1	A
GSM2235816	120	1	A
GSM2235820	720	1	A
GSM2235821	3360	0	A
GSM2235823	270	1	A
GSM2235824	2370	1	A
GSM2235827	1290	1	A
GSM2235831	1170	1	A
GSM2235837	3390	0	A
GSM2235838	120	1	A
GSM2235839	3030	1	A
GSM2235842	420	1	A
GSM2235844	3060	0	A
GSM2235845	930	1	A
GSM2235848	1200	1	A
GSM2235849	30	1	A
GSM2235850	3480	0	A
GSM2235852	1440	1	A
GSM2235854	3330	0	A
GSM2235855	3300	0	A
GSM2235863	3990	0	A
GSM2235864	360	1	A
GSM2235866	3870	0	A
GSM2235867	3750	0	A
GSM2235880	510	1	A
GSM2235883	570	1	A
GSM2235899	1020	1	A
GSM2235902	1020	1	A
GSM2235904	630	1	A
GSM2235905	60	1	A
GSM2235908	3690	0	A
GSM2235910	4170	0	A
GSM2235923	420	1	A
GSM2235924	4050	0	A
GSM2235927	0	1	A
GSM2235930	2220	1	A
GSM2235931	3960	0	A
GSM2235932	1770	0	A
GSM2235935	570	1	A
GSM2235939	1350	0	A
GSM2235940	990	1	A
GSM2235944	3780	0	A
GSM2235945	1110	1	A
GSM2235946	3930	0	A
GSM2235947	3870	0	A
GSM2235949	3960	0	A
GSM2235950	3840	0	A
GSM2235951	150	1	A
GSM2235953	300	1	A
GSM2235955	4470	0	A
GSM2235956	4050	1	A
GSM2235958	4560	0	A
GSM2235963	810	1	A
GSM2235964	660	1	A
GSM2235965	1890	1	A
GSM2235966	990	0	A
GSM2235967	300	1	A
GSM2235968	1770	0	A
GSM2235970	540	1	A
GSM2235971	1890	0	A
GSM2235973	1860	0	A
GSM2235977	210	1	A
GSM2235984	240	1	A
GSM2235985	1050	0	A
GSM2235986	1050	0	A
GSM2235987	1050	0	A
GSM2235988	2100	0	A
GSM2235991	960	1	A
GSM2235993	3780	0	A
GSM2235994	3690	0	A
GSM2235998	3660	0	A
GSM2236000	3660	0	A
GSM2236001	3720	0	A
GSM2236002	3870	0	A
GSM2236003	3780	0	A
GSM2236005	270	1	A
GSM2236006	720	1	A
GSM2236008	900	1	A
GSM2236009	810	1	A
GSM2236010	1140	1	A
GSM2236017	510	1	A
GSM2236021	1530	1	A
GSM2236025	1170	1	A
GSM2236026	1920	1	A
GSM2236027	3720	0	A
GSM2236033	3600	0	A
GSM2236036	1230	0	A
GSM2236037	1230	0	A
GSM2236038	1200	0	A
GSM2236039	1260	0	A
GSM2236040	1110	0	A
GSM2236041	1230	0	A
GSM2236045	4830	0	A
GSM2236046	1050	1	A
GSM2236047	1470	1	A
GSM2236049	990	1	A
GSM2236051	1140	1	A
GSM2236053	660	1	A
GSM2236054	2370	1	A
GSM2236057	1110	1	A
GSM2236065	3570	0	A
GSM2236068	1260	1	A
GSM2236071	3420	0	A
GSM2236072	990	1	A
GSM2236073	660	1	A
GSM2236076	1050	0	A
GSM2236078	4260	0	A
GSM2236082	3930	0	A
GSM2236083	210	1	A
GSM2236090	930	1	A
TCGA-CG-5723	2496	0	B
TCGA-VQ-A8PB	1043	1	B
TCGA-BR-A4J4	16	0	B
TCGA-CG-5724	366	1	B
TCGA-BR-4187	141	1	B
TCGA-CG-4475	699	0	B
TCGA-BR-8291	607	1	B
TCGA-VQ-A91D	356	1	B
TCGA-BR-6455	422	1	B
TCGA-BR-6456	526	1	B
TCGA-BR-8365	533	1	B
TCGA-BR-7707	1090	0	B
TCGA-BR-A4CS	45	1	B
TCGA-F1-A448	647	0	B
TCGA-D7-A6EV	342	0	B
TCGA-BR-8060	348	1	B
TCGA-BR-4257	294	1	B
TCGA-RD-A7C1	507	1	B
TCGA-IN-7808	105	1	B
TCGA-BR-7196	666	0	B
TCGA-CD-8526	381	0	B
TCGA-R5-A7ZI	2267	0	B
TCGA-CD-A48C	353	1	B
TCGA-HU-8238	46	0	B
TCGA-RD-A8N5	1747	1	B
TCGA-D7-A6EZ	618	1	B
TCGA-KB-A93G	613	0	B
TCGA-VQ-A91Q	633	1	B
TCGA-CG-4469	215	1	B
TCGA-HF-7133	1918	0	B
TCGA-EQ-8122	243	1	B
TCGA-BR-8591	856	0	B
TCGA-HU-8610	23	0	B
TCGA-IN-A7NT	323	0	B
TCGA-CG-5734	243	1	B
TCGA-BR-4279	291	1	B
TCGA-CG-5718	1095	1	B
TCGA-CD-5813	377	1	B
TCGA-CG-4460	669	1	B
TCGA-BR-6705	779	1	B
TCGA-HU-8602	679	0	B
TCGA-BR-4256	284	1	B
TCGA-D7-6521	564	0	B
TCGA-ZQ-A9CR	24	1	B
TCGA-D7-6528	463	0	B
TCGA-BR-8686	635	1	B
TCGA-VQ-A8PP	712	1	B
TCGA-IP-7968	77	0	B
TCGA-VQ-A94P	81	1	B
TCGA-R5-A805	281	1	B
TCGA-RD-A8N4	2171	0	B
TCGA-HU-A4H4	725	0	B
TCGA-BR-8366	29	0	B
TCGA-BR-7901	105	1	B
TCGA-HU-8604	694	0	B
TCGA-VQ-AA6D	521	0	B
TCGA-RD-A8MW	1153	1	B
TCGA-VQ-A8PK	543	1	B
TCGA-BR-8059	439	1	B
TCGA-D7-6525	406	1	B
TCGA-BR-8678	754	0	B
TCGA-BR-7957	276	1	B
TCGA-BR-7717	552	1	B
TCGA-CG-4306	1	1	B
TCGA-VQ-A922	275	1	B
TCGA-HU-8249	881	0	B
TCGA-R5-A7ZF	259	1	B
TCGA-BR-8080	292	1	B
TCGA-IN-A6RR	205	1	B
TCGA-VQ-A928	174	1	B
TCGA-F1-6875	2197	1	B
TCGA-VQ-A8PE	675	1	B
TCGA-VQ-A91A	1200	0	B
TCGA-FP-8209	1811	1	B
TCGA-MX-A5UJ	600	0	B
TCGA-HU-A4H3	882	0	B
TCGA-D7-8575	554	1	B
TCGA-BR-8380	21	0	B
TCGA-BR-4191	558	1	B
TCGA-D7-6524	543	0	B
TCGA-R5-A7ZE	554	1	B
TCGA-R5-A7O7	1389	0	B
TCGA-BR-4201	940	1	B
TCGA-BR-7723	874	1	B
TCGA-BR-8677	813	0	B
TCGA-BR-7959	1010	0	B
TCGA-IN-8462	572	0	B
TCGA-BR-A4IV	869	1	B
TCGA-CD-8530	377	0	B
TCGA-BR-A4J7	989	0	B
TCGA-CG-4301	92	0	B
TCGA-HJ-7597	805	1	B
TCGA-MX-A663	300	1	B
GSM1523728	2646.9	1	B
GSM1523745	3165.9	1	B
GSM1523746	765	0	B
GSM1523768	726.9	0	B
GSM1523770	662.1	0	B
GSM1523771	380.1	0	B
GSM1523773	129.9	0	B
GSM1523774	2931	1	B
GSM1523775	2928	1	B
GSM1523778	2778.9	1	B
GSM1523782	132	0	B
GSM1523790	2427.9	1	B
GSM1523794	810	0	B
GSM1523795	2402.1	1	B
GSM1523798	1854.9	0	B
GSM1523799	2325	1	B
GSM1523800	2307.9	1	B
GSM1523803	212.1	0	B
GSM1523805	134.1	0	B
GSM1523807	2211.9	1	B
GSM1523808	2205	1	B
GSM1523810	2192.1	1	B
GSM1523811	2186.1	1	B
GSM1523812	2184.9	1	B
GSM1523814	2181.9	1	B
GSM1523823	2127	1	B
GSM1523828	176.1	0	B
GSM1523833	266.1	0	B
GSM1523834	1337.1	0	B
GSM1523835	2079	1	B
GSM1523836	2076.9	1	B
GSM1523838	309.9	0	B
GSM1523839	2073.9	1	B
GSM1523845	290.1	0	B
GSM1523846	2051.1	1	B
GSM1523848	2043.9	1	B
GSM1523849	840.9	0	B
GSM1523851	2016.9	1	B
GSM1523856	1986	1	B
GSM1523858	513	0	B
GSM1523859	1593.9	1	B
GSM1523861	1944	1	B
GSM1523866	131.1	0	B
GSM1523868	1898.1	1	B
GSM1523871	1871.1	1	B
GSM1523873	720.9	0	B
GSM1523874	1863	1	B
GSM1523875	254.1	0	B
GSM1523886	168	0	B
GSM1523891	1787.1	1	B
GSM1523903	1194	0	B
GSM1523906	1659	1	B
GSM1523908	1652.1	1	B
GSM1523911	654.9	0	B
GSM1523922	708	0	B
GSM1523928	1623.9	0	B
GSM1523930	2355.9	1	B
GSM1523933	2258.1	1	B
GSM1523935	2622	1	B
GSM1523941	135.9	0	B
GSM1523945	525.9	0	B
GSM1523947	2052.9	1	B
GSM1523949	303	0	B
GSM1523958	3006.9	1	B
GSM1523962	603.9	0	B
GSM1523965	344.1	0	B
GSM1523979	282.9	0	B
GSM1523981	2916	1	B
GSM1523982	261	0	B
GSM1523983	303	0	B
GSM1523984	2909.1	1	B
GSM1523985	2325.9	0	B
GSM1523993	2043.9	0	B
GSM1523997	756	0	B
GSM1524006	788.1	0	B
GSM1524007	311.1	0	B
GSM1524009	1950	0	B
GSM1524021	387.9	0	B
GSM1524022	240.9	0	B
GSM1524032	2316	0	B
GSM1524038	258.9	0	B
GSM1524039	362.1	0	B
GSM1524041	2319.9	1	B
GSM1524042	324.9	0	B
GSM1524043	504.9	0	B
GSM1524044	686.1	0	B
GSM1524055	1137.9	0	B
GSM1524058	2564.1	1	B
GSM1524059	2556	1	B
GSM1524060	2544.9	1	B
GSM387789	914	0	B
GSM387802	456	0	B
GSM387806	592	0	B
GSM387808	176	0	B
GSM387809	141	0	B
GSM387811	97	1	B
GSM387819	875	1	B
GSM387822	6	0	B
GSM387824	3795	0	B
GSM387827	2796	0	B
GSM387828	3533	0	B
GSM387829	3824	0	B
GSM387831	311	1	B
GSM387834	1259	1	B
GSM387835	392	1	B
GSM387836	593	1	B
GSM387838	912	1	B
GSM387841	125	1	B
GSM387845	124	1	B
GSM387847	3316	1	B
GSM387848	2983	1	B
GSM387849	342	1	B
GSM387850	194	1	B
GSM387852	510	1	B
GSM387853	498	1	B
GSM387856	785	1	B
GSM387857	242	1	B
GSM387859	332	1	B
GSM387860	7	0	B
GSM387862	141	1	B
GSM387863	1352	0	B
GSM387868	1997	0	B
GSM387870	138	1	B
GSM387874	430	1	B
GSM387886	2183	0	B
GSM387889	332	1	B
GSM387893	1589	0	B
GSM387895	79	0	B
GSM387898	2358	1	B
GSM387909	865	1	B
GSM387918	4651	0	B
GSM387927	1182	1	B
GSM387929	346	1	B
GSM387931	4467	0	B
GSM387932	796	1	B
GSM387936	979	1	B
GSM387940	98.1	1	B
GSM387941	590	1	B
GSM387942	10	0	B
GSM387947	537	1	B
GSM387959	98	1	B
GSM387961	608	1	B
GSM387962	270	1	B
GSM387965	1768	0	B
GSM387973	220	0	B
GSM387976	3715	0	B
GSM387981	739	1	B
GSM387983	1707	1	B
GSM387984	67	0	B
GSM2235569	2460	0	B
GSM2235571	2400	0	B
GSM2235574	330	1	B
GSM2235584	1710	1	B
GSM2235598	630	1	B
GSM2235600	2220	0	B
GSM2235601	2220	0	B
GSM2235607	180	1	B
GSM2235608	2400	0	B
GSM2235613	2490	0	B
GSM2235614	2310	0	B
GSM2235615	2310	0	B
GSM2235624	2310	0	B
GSM2235626	2310	0	B
GSM2235627	2100	0	B
GSM2235628	2220	0	B
GSM2235629	1080	1	B
GSM2235634	2220	0	B
GSM2235706	60	1	B
GSM2235710	390	1	B
GSM2235716	3120	1	B
GSM2235719	30	1	B
GSM2235724	300	1	B
GSM2235725	3660	0	B
GSM2235727	3540	0	B
GSM2235728	1050	1	B
GSM2235729	150	1	B
GSM2235732	3540	0	B
GSM2235733	4320	0	B
GSM2235734	4320	0	B
GSM2235735	4350	0	B
GSM2235739	420	1	B
GSM2235743	120	1	B
GSM2235748	60	1	B
GSM2235750	210	1	B
GSM2235751	3030	0	B
GSM2235753	930	1	B
GSM2235754	4140	0	B
GSM2235756	4200	0	B
GSM2235759	360	1	B
GSM2235765	4140	0	B
GSM2235766	450	1	B
GSM2235767	540	1	B
GSM2235769	660	1	B
GSM2235781	3450	0	B
GSM2235782	120	1	B
GSM2235785	3420	0	B
GSM2235792	2760	1	B
GSM2235793	2610	1	B
GSM2235795	3630	0	B
GSM2235796	1320	1	B
GSM2235807	990	1	B
GSM2235813	780	1	B
GSM2235814	3390	0	B
GSM2235815	3390	0	B
GSM2235818	300	1	B
GSM2235822	3360	0	B
GSM2235825	690	1	B
GSM2235826	330	1	B
GSM2235840	2760	1	B
GSM2235843	390	1	B
GSM2235846	2760	1	B
GSM2235862	2550	1	B
GSM2235878	3750	0	B
GSM2235879	180	1	B
GSM2235881	3750	0	B
GSM2235882	390	1	B
GSM2235884	3780	0	B
GSM2235885	3720	0	B
GSM2235886	1530	1	B
GSM2235901	1740	1	B
GSM2235903	3930	0	B
GSM2235907	3690	0	B
GSM2235926	4200	0	B
GSM2235929	1800	1	B
GSM2235933	1230	0	B
GSM2235948	3960	0	B
GSM2235952	30	1	B
GSM2235954	4470	0	B
GSM2235957	4440	0	B
GSM2235959	4320	0	B
GSM2235961	4230	0	B
GSM2235962	810	1	B
GSM2235978	1020	0	B
GSM2235980	180	1	B
GSM2235981	1080	0	B
GSM2235983	1140	0	B
GSM2235992	3840	0	B
GSM2235995	300	1	B
GSM2235996	180	1	B
GSM2235997	3840	0	B
GSM2235999	2850	1	B
GSM2236007	630	1	B
GSM2236011	780	1	B
GSM2236012	90	1	B
GSM2236018	3480	0	B
GSM2236028	2850	1	B
GSM2236030	4140	0	B
GSM2236031	4020	0	B
GSM2236032	4020	0	B
GSM2236059	4110	0	B
GSM2236060	1110	1	B
GSM2236062	3870	0	B
GSM2236064	2310	1	B
GSM2236067	510	1	B
GSM2236075	1170	1	B
GSM2236080	420	1	B
GSM2236089	4320	0	B
GSM2236091	3690	1	B
GSM2236094	1110	1	B
TCGA-MX-A5UG	113	1	C
TCGA-VQ-A8E2	1319	0	C
TCGA-BR-8682	991	0	C
TCGA-VQ-A91K	1862	0	C
TCGA-BR-8683	300	1	C
TCGA-BR-6565	279	1	C
TCGA-BR-8592	191	1	C
TCGA-BR-8589	825	0	C
TCGA-BR-8081	981	0	C
TCGA-D7-A6F2	476	0	C
TCGA-BR-8077	21	0	C
TCGA-BR-6802	940	0	C
TCGA-HF-7134	1588	0	C
TCGA-HU-A4GX	616	0	C
TCGA-BR-8372	951	0	C
TCGA-BR-8485	280	0	C
TCGA-VQ-A8P2	1160	0	C
TCGA-CG-4438	1645	0	C
TCGA-CD-8529	374	0	C
TCGA-VQ-A94O	640	1	C
TCGA-VQ-A8E3	661	1	C
TCGA-VQ-A8PH	389	1	C
TCGA-MX-A666	427	0	C
TCGA-F1-6874	440	0	C
TCGA-VQ-A8DZ	396	1	C
TCGA-BR-6566	997	0	C
TCGA-IN-A6RS	383	0	C
TCGA-BR-7716	1210	0	C
TCGA-BR-8588	389	0	C
TCGA-BR-A4PF	35	0	C
TCGA-VQ-A8PF	76	1	C
TCGA-SW-A7EB	176	0	C
TCGA-HU-A4GQ	3	1	C
TCGA-BR-8368	131	0	C
TCGA-VQ-AA6G	792	1	C
TCGA-CG-5720	30	1	C
TCGA-HU-8608	641	0	C
TCGA-BR-A4QL	491	1	C
TCGA-HF-7132	2351	0	C
TCGA-CG-4444	1431	0	C
TCGA-D7-8572	511	0	C
TCGA-VQ-A91S	1000	0	C
TCGA-VQ-AA6J	838	0	C
TCGA-ZA-A8F6	525	0	C
TCGA-VQ-A8PO	282	1	C
TCGA-BR-7851	378	0	C
TCGA-BR-6453	485	0	C
TCGA-VQ-A927	200	1	C
TCGA-BR-6852	1367	0	C
TCGA-CG-4477	942	0	C
TCGA-CG-5732	2100	1	C
TCGA-D7-5578	385	0	C
TCGA-HU-A4GU	200	0	C
TCGA-BR-8361	946	0	C
TCGA-BR-4280	201	1	C
TCGA-HU-A4GT	198	0	C
TCGA-D7-8579	636	0	C
TCGA-HU-A4HB	477	1	C
TCGA-IN-7806	1106	0	C
TCGA-VQ-A924	1686	1	C
TCGA-BR-4253	124	1	C
TCGA-VQ-A91U	52	1	C
TCGA-VQ-A8E7	1138	0	C
TCGA-BR-8373	450	0	C
TCGA-HU-8244	742	0	C
TCGA-VQ-A91X	289	1	C
TCGA-D7-6526	523	0	C
TCGA-CD-A4MH	371	0	C
TCGA-CG-4436	243	0	C
TCGA-CG-4465	274	1	C
TCGA-BR-8382	762	1	C
TCGA-HF-A5NB	928	0	C
TCGA-D7-6522	566	0	C
TCGA-HU-A4GF	785	0	C
TCGA-RD-A7BT	262	1	C
TCGA-BR-6563	1190	0	C
TCGA-D7-6815	486	0	C
TCGA-FP-A9TM	189	0	C
TCGA-HU-A4GD	692	0	C
GSM1523769	411.9	0	C
GSM1523777	2787.9	1	C
GSM1523779	2778	1	C
GSM1523783	2757.9	1	C
GSM1523791	2433.9	1	C
GSM1523793	2421.9	1	C
GSM1523796	1728.9	0	C
GSM1523801	2307.9	1	C
GSM1523802	2303.1	1	C
GSM1523820	711	0	C
GSM1523821	2133	1	C
GSM1523822	2129.1	1	C
GSM1523824	2120.1	1	C
GSM1523826	81	0	C
GSM1523827	2100.9	1	C
GSM1523830	1602.9	0	C
GSM1523837	804.9	0	C
GSM1523847	2043.9	1	C
GSM1523852	930	0	C
GSM1523853	2001.9	1	C
GSM1523854	2001.9	1	C
GSM1523855	657.9	0	C
GSM1523860	1266	0	C
GSM1523867	998.1	0	C
GSM1523869	1875.9	1	C
GSM1523872	450.9	0	C
GSM1523876	1857	1	C
GSM1523879	1835.1	1	C
GSM1523880	1829.1	1	C
GSM1523883	1185.9	0	C
GSM1523885	1806.9	1	C
GSM1523887	1806	1	C
GSM1523892	1784.1	1	C
GSM1523894	1073.1	0	C
GSM1523898	1764.9	1	C
GSM1523901	1724.1	1	C
GSM1523910	1629.9	1	C
GSM1523921	2499	1	C
GSM1523923	792	0	C
GSM1523927	2423.1	1	C
GSM1523929	2649.9	1	C
GSM1523932	380.1	0	C
GSM1523942	2108.1	1	C
GSM1523944	2088.9	1	C
GSM1523946	2067.9	1	C
GSM1523950	2046	1	C
GSM1523954	3026.1	1	C
GSM1523956	933.9	0	C
GSM1523959	522.9	0	C
GSM1523972	195	0	C
GSM1523978	486.9	0	C
GSM1523980	201	0	C
GSM1524000	2816.1	1	C
GSM1524002	2583.9	1	C
GSM1524003	2577.9	1	C
GSM1524012	2556.9	1	C
GSM1524013	2697	1	C
GSM1524014	339.9	0	C
GSM1524023	2514.9	1	C
GSM1524025	2454.9	0	C
GSM1524036	2397.9	1	C
GSM1524040	1085.1	0	C
GSM1524045	2673.9	1	C
GSM1524051	2618.1	1	C
GSM1524053	2607.9	1	C
GSM1524056	425.1	0	C
GSM387791	610	0	C
GSM387796	615	1	C
GSM387805	327	0	C
GSM387807	148	0	C
GSM387810	111	0	C
GSM387812	333	0	C
GSM387813	118	0	C
GSM387814	516	1	C
GSM387816	50	1	C
GSM387817	2642	0	C
GSM387846	2829	1	C
GSM387858	278	1	C
GSM387872	2569	0	C
GSM387873	2943	0	C
GSM387877	2175	0	C
GSM387882	491	1	C
GSM387885	1153	0	C
GSM387887	175	1	C
GSM387894	1997	0	C
GSM387900	179	0	C
GSM387908	548	1	C
GSM387912	513	0	C
GSM387915	4735	0	C
GSM387916	1911	1	C
GSM387922	4617	0	C
GSM387923	1	0	C
GSM387928	815	0	C
GSM387930	404	1	C
GSM387933	390	0	C
GSM387934	4253	0	C
GSM387935	152	1	C
GSM387944	2569	0	C
GSM387945	198	0	C
GSM387946	438	1	C
GSM387948	4124	0	C
GSM387949	78	0	C
GSM387954	642	1	C
GSM387955	389	1	C
GSM387956	386	0	C
GSM387957	458	1	C
GSM387968	460	1	C
GSM387970	94	1	C
GSM387971	707	1	C
GSM387972	10	0	C
GSM387974	4023	0	C
GSM387977	1374	1	C
GSM2235597	2520	0	C
GSM2235696	3240	0	C
GSM2235699	690	1	C
GSM2235701	3240	0	C
GSM2235704	3270	0	C
GSM2235705	3420	0	C
GSM2235707	3480	0	C
GSM2235708	3270	0	C
GSM2235714	1380	1	C
GSM2235717	90	1	C
GSM2235718	3570	0	C
GSM2235730	1470	1	C
GSM2235731	3540	0	C
GSM2235737	1350	1	C
GSM2235738	4590	0	C
GSM2235740	120	1	C
GSM2235747	360	1	C
GSM2235752	4470	0	C
GSM2235757	1200	1	C
GSM2235762	1170	1	C
GSM2235768	4320	0	C
GSM2235779	1470	1	C
GSM2235780	0	1	C
GSM2235784	3090	1	C
GSM2235787	750	1	C
GSM2235788	3510	0	C
GSM2235789	1110	1	C
GSM2235794	3630	0	C
GSM2235797	3450	0	C
GSM2235798	750	1	C
GSM2235802	3180	0	C
GSM2235803	3210	0	C
GSM2235809	4380	0	C
GSM2235810	210	1	C
GSM2235812	1020	1	C
GSM2235817	1650	1	C
GSM2235819	630	1	C
GSM2235828	3210	0	C
GSM2235829	3270	0	C
GSM2235830	2940	0	C
GSM2235841	480	1	C
GSM2235847	3330	0	C
GSM2235851	2790	1	C
GSM2235853	3330	0	C
GSM2235865	990	1	C
GSM2235887	2370	1	C
GSM2235888	2040	1	C
GSM2235889	2790	1	C
GSM2235900	3810	0	C
GSM2235906	3600	1	C
GSM2235909	540	1	C
GSM2235921	4170	0	C
GSM2235922	4140	0	C
GSM2235925	4020	0	C
GSM2235928	3960	0	C
GSM2235934	1410	0	C
GSM2235936	1260	0	C
GSM2235937	1110	0	C
GSM2235938	2760	0	C
GSM2235941	1230	0	C
GSM2235942	1260	0	C
GSM2235943	3810	0	C
GSM2235960	4260	0	C
GSM2235969	1920	0	C
GSM2235972	1710	0	C
GSM2235974	360	1	C
GSM2235975	1830	0	C
GSM2235976	1650	0	C
GSM2235979	1260	0	C
GSM2235982	1110	0	C
GSM2236004	1380	1	C
GSM2236013	1590	1	C
GSM2236014	3150	1	C
GSM2236015	3300	0	C
GSM2236016	600	1	C
GSM2236019	2760	1	C
GSM2236020	3270	0	C
GSM2236022	3120	0	C
GSM2236023	3240	0	C
GSM2236024	3090	0	C
GSM2236029	4140	0	C
GSM2236034	3660	0	C
GSM2236042	1110	0	C
GSM2236043	1200	0	C
GSM2236044	4230	0	C
GSM2236048	3060	0	C
GSM2236050	3030	0	C
GSM2236052	3480	0	C
GSM2236055	3990	0	C
GSM2236056	3840	0	C
GSM2236058	4080	0	C
GSM2236061	3870	0	C
GSM2236063	3930	0	C
GSM2236066	3810	0	C
GSM2236069	3450	0	C
GSM2236070	3720	0	C
GSM2236074	4290	0	C
GSM2236077	1140	0	C
GSM2236079	4230	0	C
GSM2236084	3840	0	C
GSM2236085	4560	0	C
GSM2236086	4470	0	C
GSM2236087	4650	0	C
GSM2236088	1020	1	C
GSM2236092	4470	0	C
GSM2236093	4530	0	C
GSM2236095	4500	0	C
