# Supplementary material for: Comprehensive characterization of pyroptosis phenotypes with distinct tumor immune profiles in gastric cancer to aid immunotherapy
Source: Aging (Albany NY). 2023 Aug 17;15(16):8113–36. doi: 10.18632/aging.204958 (PMC10497016; doi:10.18632/aging.204958)
Supplement: Supplementary Table 2 [file aging-15-204958-s003.xlsx]

## Sheet: Sheet1
Supplementary Table 2. The list of 1629 overlapped pyroptosis phenotype-related DEGs among three pyroptosis phenotypes.
IL6
OSM
IL11
PI15
TNFAIP6
IL24
CCL3
SELE
SOCS3
IL1B
CSF2
SLC2A3
PROK2
G0S2
NAMPT
CSF3
PTGS2
NFIL3
PLAU
AQP9
IL1A
CCL8
GPR84
MMP3
RGS16
ADM
TREM1
FPR2
FPR1
SOD2
S100A8
C5AR1
TNFAIP3
SLC2A14
CLEC5A
S100A12
CXCL6
HAS1
PDE4B
FCGR2A
HIF1A
CXCL1
LILRA5
SLC11A1
S100A9
PFKFB3
SNAI1
CCL7
MMP19
BCL2A1
GPR4
NR4A3
EGFL6
RCAN1
MAP3K8
CCL4
HMOX1
PRR16
BCAT1
INHBA
PLAUR
NID2
IL13RA2
ADAM12
APLN
NLRP3
SRGN
PANX1
COL5A3
TLR2
PDGFB
CD86
APOBEC3A
EREG
NCF2
CLEC4A
CLEC4D
PLEK
MMP10
GADD45B
MMP1
STX11
COL7A1
HCK
CD163
P2RY6
FCGR3B
WNT2
BATF3
NFKBIA
PIM1
MMP13
LCP2
ANGPTL4
MMP9
SAMSN1
LILRB2
FCER1G
LIF
CCR1
ZNF469
TDO2
PILRA
RND3
COL15A1
CXCL2
CLEC7A
VEGFC
CD200
TLR4
EGR3
CD69
SPP1
TNF
MMP8
MNDA
FCGR2C
RNASE2
PPBP
FFAR2
MFAP3
KLF6
SLN
FCGR1B
CYP26B1
DUSP14
IER3
FCAR
EPB41L3
RAB31
SERPINB9
LILRA2
ICAM1
TRPC6
FCGR1A
GAS1
PDCD1LG2
OLR1
CALU
MAFF
LMCD1
TIMP1
BCL6
ITGA5
EMILIN2
CCDC102B
NOD2
CHST11
UCN2
CASP5
SH3GLB1
SOX17
ADAMTS1
OSCAR
CASS4
MRC1
SLC16A6
CSF3R
ANGPTL2
COL1A2
FNDC1
LGALS1
TAGAP
METRNL
COL4A2
CREM
FPR3
MARCO
FCN3
S100A3
XIRP1
RGS3
ALOX5AP
CDH5
TNFRSF4
RASGRF2
C3AR1
MCL1
COL13A1
KLF10
WNT5A
ESM1
CSF2RB
SGTB
DCUN1D3
LHFPL2
COL3A1
VIM
CDKN1A
CHN1
CYP4F12
NFKBIZ
RECQL
CD83
PCDH12
ENG
FGF7
IL7R
NIN
CSGALNACT1
SLAMF9
VGLL3
THY1
HBEGF
VCAN
TMEM45A
COL11A1
THBS2
VASN
DNAJB9
IL1RN
SPARC
ST8SIA4
COL6A3
PNRC1
PCOLCE
TIMP2
GNG10
TCP11L1
COL5A1
PADI4
RCN3
LILRB5
AIF1
SPOCD1
TRAK1
FSCN1
ADAMTS12
MSR1
RHOQ
FRMD6
MS4A4A
ADH1C
IFITM3
PODXL
PDGFRB
SPIRE2
GCH1
C1R
FGF2
RAB11FIP4
MYO1A
HIPK3
ANKRD37
COL18A1
PLEKHA6
APBA2
MUCL1
LAPTM5
SH3BP5
PICALM
BGN
ZNF281
LRRC15
IER5
MAP1LC3B
CLEC1A
LIMS3
PMAIP1
HEG1
RGS18
MAP2K1
MSN
FBN1
AVPR1A
PDGFRL
LUM
ESAM
CHIC2
MSX1
TUBB6
ATF7IP2
EMP3
BEST1
HIVEP2
CCDC12
MRC2
SPOCK1
HIP1
DNAJB6
HAVCR2
ANXA5
RBMS1
PF4V1
ITGB2
SLC43A2
APCDD1L
C1orf54
ACSL4
RAB8B
MRPS25
MCAM
SELL
SOX11
CCL22
COL6A2
LAT2
PAG1
RAI14
TSPAN4
PROM2
FSTL1
ZFPM1
WIPF1
PHACTR1
IL1RAP
FLVCR2
GEM
GNG11
PTPN12
TNC
RHBDL2
DCN
FST
HDHD3
GMFG
EGR1
LCOR
GJA1
CXCL14
GOLT1B
RARRES2
FAM89A
PHTF2
PTPRE
ARL5B
SPRY1
PAQR8
C1S
CHST7
NEDD4L
CD276
MYO1G
CLIC4
HIVEP3
CERCAM
GLYCTK
FLT4
KIF2A
ARIH1
SEMA4C
NR4A1
LAMC3
GPR137B
DAZL
GJA4
TTBK2
GNAI2
CCDC3
TLR1
SLC1A3
JMJD6
KCNE4
CACNA2D3
CDH11
WWTR1
ADH1A
SEMA7A
GNAI3
OSMR
GSTA1
PTAFR
PBLD
AJAP1
IGFBP5
RAVER2
CD33
TNFRSF12A
VWF
CAV2
SAMD8
TRIM31
MTHFD2
AMT
MYH10
GLT8D2
DIRC1
DUSP7
EDNRA
KLHL5
NUAK1
PLSCR3
GUCA1A
FGD6
PLXNC1
SLC9A3R1
GPX7
SH3RF2
CHMP1B
GCLM
F13A1
INHBB
CXCL12
HEY1
SLC2A5
VIPR1
IL17RA
RHOJ
SDC2
SERPINB8
MXD1
CLEC11A
ELOVL5
SEC23A
APOLD1
PWP1
ABHD14B
TJP3
GNA11
SH2D3C
MMP25
TMEM125
HOMER3
SFRP2
TGFB3
GLB1L
ROBO1
RAPGEFL1
KCNJ8
SH3YL1
PPARGC1B
SAA1
TWSG1
REG1B
FBLN2
LIPG
LMAN1
CES2
CDS1
HECTD3
VAV1
ELMO3
STK39
TMOD2
NUDCD1
GREM1
SOX18
IGFBP4
SLC25A20
SCN1B
RGS4
CCDC80
BLNK
AEBP1
EMCN
LAMC1
IL17A
STX19
SCRN2
EPHX2
AMIGO2
AP3S1
EVPL
SEMA4G
BUB1
SUCLG2
GNG2
IFITM1
OSTF1
USH1C
MAP4K4
CDKN3
RASIP1
WDR47
FUT2
RNF217
RNF149
CKAP2
PRSS8
MAPRE1
DACT1
BCL10
TSHZ3
PRSS23
GPM6B
PSMG1
PIGR
COX4I1
LARP6
AXL
EFEMP2
MGAT4A
RDX
ZNF200
PTPRH
GABARAPL1
ETS2
FHL3
CCL20
AGR3
FIBIN
UBE2E2
SERPING1
ZNF532
WDHD1
NUDT11
PLA2G2A
TST
COLEC12
C2
FKBP7
HES4
PDZD3
LPAR1
LRRC32
ITGAV
FBP1
IL32
GCNT1
BAG3
COL4A5
PEA15
ACOT11
AKAP12
C1orf116
FBXO32
UBQLN1
SMPD3
FAAH
TNFRSF9
C4orf19
COL8A1
CRISPLD2
CHEK2
COL6A1
BNIP3
AKAP1
CASP1
ST3GAL4
C1orf216
PHF19
MCC
PAFAH2
DENND1A
CALML4
PDLIM4
PCDHB10
MYH14
TPST1
IHH
CPNE8
ANXA6
DECR2
FES
MYADM
IL21R
GPC6
RAB25
IGFBP7
NES
SHANK3
PCYT2
MXRA8
AGPAT4
EBF3
PLEKHH1
PTPN14
FNDC4
COL9A2
GOLM1
NUP98
GGT5
CKAP4
PIWIL2
MST1R
CH25H
TMEM38B
GGT6
DPYSL2
NBN
GALM
ACADS
SLC30A1
GPX2
MGST2
MAGEH1
CAV1
TTLL6
HSPA2
CSRP2
LNX1
COL16A1
PTPRM
LPAR5
RFC3
ELOVL6
ANKS4B
SERPINF1
SHROOM1
SIRT5
CC2D1A
RILPL1
EBF1
CCL28
SHE
HSPA1A
CHEK1
PTPN2
SLC5A1
MRAS
PRPF4
TIPIN
GDPD2
LMNB1
CA13
PLEKHO1
SYDE1
MIER3
KIF3C
LRBA
FAM3D
SAMD13
S100A4
APOL6
ABCC6
ZNF521
CLEC14A
IFNGR1
TRO
NOLC1
GK2
TLN2
FRK
ZNF33B
CHD1
ZIC5
EPSTI1
EPS8L3
PPP1R16A
NRAS
TEK
KIAA0355
CCNE2
FOXN2
LLGL2
CYYR1
SLC41A1
IRF1
POMP
CENPN
ACSM3
SASH1
TAP2
ONECUT2
FAM91A1
EFS
SORCS2
PKD2
RFTN1
DKK3
HSPA12B
DIAPH3
PPP3R1
FOXO1
AHCYL2
RSPH1
MFGE8
CHST14
CGN
CKMT1A
RRM2
IFT172
MKRN1
ECH1
USP12
CYB5R4
FGD5
VKORC1
FYN
BPNT1
GREM2
RAP2C
MLLT11
OMA1
ZSWIM1
PLVAP
DDC
MPV17
BICD2
PDGFC
AKR1B1
CRYL1
MGAT3
ZNF91
MUC17
MSH5
PRR15
UCHL1
C1orf131
CYB5R3
SP6
GSTT2
MAP3K3
PCDHB16
ACY3
CDC5L
ZDHHC3
MELK
RBP7
GZMA
NOL7
MAMLD1
TMEM200A
PKIG
MCM10
GRASP
H19
AP1M2
BAZ1A
FUT6
DCLRE1B
DEGS2
A4GALT
KCNK10
PNO1
GYPC
TMEM30B
LYAR
CKB
ANAPC1
TSPAN9
IGF1R
LAD1
FAM53B
DDR2
LIAS
PATL1
ZNF552
E2F7
GTF2H3
ASL
RFTN2
SGIP1
CLYBL
TMEM109
ALDOB
SYNCRIP
MID2
ATAD2
ADAMDEC1
MMP15
RAB15
TGFB2
CPT1C
RFC5
SLC36A1
PPP2R1B
PSMD14
BAIAP2L2
DDR1
GPR35
RAB17
GMFB
TRMT5
RASAL2
GRAMD1C
SLAMF7
EHD2
ATOH1
SNCA
C9orf40
MYO18A
ADD3
LRRC8A
SLC37A1
FAM124B
DNALI1
GPT
CENPE
ZFPM2
AP1G2
RUSC2
TFDP1
EEF2K
CHRDL2
SLC30A6
MAP3K13
SPC25
CHORDC1
MLLT6
ATP7B
TMEM45B
C8orf76
CXCL11
ZNF385D
EXPH5
LGALS4
NOTCH3
SLC25A34
POLR3G
FERMT2
DPYSL3
GLI3
ADH4
FKBP14
HINT3
GATA6
DQX1
HPGD
KLHL21
ALDH5A1
SLC40A1
COPZ2
PRKAR1A
C1orf122
C1GALT1
SLC23A3
PLTP
EPB41L2
LAMA2
AMOTL1
LYPD5
PRKD1
TIMP3
PSMB9
TIMM17A
TUSC3
IDE
MPST
SECTM1
B3GNT5
MAOA
LETMD1
NR5A2
CHST3
CORO2A
SLC2A9
AFTPH
MICALL2
CXADR
IGFBP2
FOXF2
LTBP1
IL26
CENPI
CNOT8
HMGN4
ACTN1
ACOX3
SERTAD4
ID3
ARHGAP11A
SLAIN1
TPRKB
FABP4
KPNA2
ENO2
NAE1
PPM1F
VAT1
SLC39A5
HOOK1
PTPN22
ADHFE1
APCDD1
HADH
UQCRC1
KIAA1522
TNK1
SOCS1
SMC2
ADAMTSL4
FEZ1
LRRK1
MYO6
KIF23
SCAMP2
ARHGEF16
KCNK5
GOLPH3L
OLFML1
MAMDC2
CBLC
C1RL
SRPX
AIM2
KCTD10
ARL11
CENPQ
CYP2S1
TNFSF11
CDK7
CDCP1
S100A14
SORBS2
KIR3DL3
KIR2DL4
CSNK1G3
ZSCAN16
SPR
VPS13A
GATC
CD81
HMGCL
TSGA10
STOX2
LEAP2
HMGN2
TEKT5
SATB2
DNAJC3
ROR2
CDCA5
SLC25A40
SFRP4
TEAD2
ARL2BP
USP38
NCAPG2
HSPB2
INSC
RPGR
ECHS1
CYP1B1
SYT11
TXN2
RAB32
UBA6
DDI2
PDLIM7
ACSL6
EPB41L4B
B3GALT5
TMEM54
PTGER1
LYN
SLC22A5
HTRA1
PLSCR4
MAD2L1
ARHGAP22
HPS5
USP33
ENTPD5
GAK
GRIN3A
LIX1L
GLRX2
GNB5
SLC35A3
TSPAN1
COMTD1
MYO5B
KLF5
APAF1
MCM7
GSTK1
C1orf210
DUS1L
MATN3
GPR160
TSPAN8
WWC3
FIGNL1
LYSMD2
TOR1B
MMEL1
ABLIM3
LRPPRC
SLC22A18
PSEN1
MRPL39
FAM107B
TPI1
LPGAT1
TBC1D19
KCNQ1
KIF4A
CKAP2L
FAM149A
PIK3C2B
ROR1
MEG3
ATP8B1
SAMD12
RALGPS1
ACE2
FARP2
TPX2
GINS3
ITGBL1
SLIT3
OLFM1
ESRRA
TNFSF9
NGEF
EFEMP1
CTDSP2
DHRS1
DEPDC7
ZW10
HOXC4
STAP2
MRPL33
CKS2
TTC9C
RMND5B
SLC27A1
GPRC5B
STAT1
MAP1B
C12orf57
TMEM53
FGF13
ZNF518A
RAB11FIP1
PTPRO
MUC20
MTMR11
TRPM5
TMEM119
GALNT8
LIPH
GBA3
HIC1
FZD5
MOGAT2
ANXA4
BATF2
TESC
API5
GPBAR1
TCOF1
CCT4
PIK3AP1
MTIF3
SPIRE1
PTPN6
PLEKHG5
CAB39
BCLAF1
ABAT
ITPKA
P2RY2
SMCHD1
ZNF784
TMPRSS2
TRIM2
ASB13
IVNS1ABP
PRIM1
BDH1
FRAT2
CHCHD3
PDE3B
DPP4
PTTG1
PRR13
SLCO2B1
ACVR1
HMGB3
CHMP4C
CCDC88B
RNASEH2A
NCBP1
HOMER2
MORC4
EPHA1
MINPP1
NEIL3
DNMBP
UBE2N
RHBDF2
SLC25A43
ACAD10
PDZRN3
EXO1
GIP
POLE2
MRPL13
RECK
PLCH1
FASLG
NLRC5
GYG1
MAP2
VPS36
RAB11A
CCNA2
FGD1
DLG4
CNGA1
CCNJ
MND1
ATP6V1C2
RNGTT
CSE1L
TMTC1
GPR39
DCK
WDR76
FEN1
FBXO5
TAP1
PLA2G4C
SUSD4
PTER
MASTL
TMPRSS4
COQ2
ZFAND2B
TMC5
NAGK
ZNF184
PRND
ALDH18A1
PSD4
PIP5K1B
NADSYN1
PRMT5
DEPDC1
CCNO
TMEM92
SKP2
VAMP3
CYP3A43
RNF128
RBM28
GRPEL1
FLRT2
SSTR1
GTF3C4
MUC2
KLHL3
EYA3
CSPG4
PLA2G4F
ZWILCH
CD59
CHST4
SLC26A3
PPCS
BCL2L15
KLC1
BPHL
ZNF367
TEX264
STON1
NOTCH4
PRAF2
ANAPC4
TOX3
GAPVD1
NMI
ABCG8
METTL7B
TM6SF2
ZNF423
SULT1A2
CPZ
THNSL1
SPPL2B
PRRG4
AGMAT
CLIC5
TCF4
ITGA6
SAAL1
CBX7
PMEPA1
TTF1
RASL11B
AP1M1
FAM76B
UROD
MFAP5
GPBP1L1
ITPR1
SLC35D2
GFM2
SLC13A2
RALA
ICAM2
LRCH1
OTC
BUD13
ZBTB20
AP1S2
DGKQ
IGFBP6
RAB23
RNF6
PSRC1
FANCB
CEBPA
APTX
GPD2
NUSAP1
LPP
FBLN1
UBE2Q2
NMUR2
NIT1
TFB1M
CPT2
AMPH
TREH
EPDR1
SH2D1B
ASTE1
CFH
C6orf136
NDUFA5
STAM2
NME5
MPHOSPH6
RAMP3
SEPSECS
DHX9
LMO2
CEP55
NXT2
NR1I2
CTNNB1
GALNT7
PYCARD
HK1
CTSG
TNPO3
XYLB
RDH16
ZC3H15
LYPLA1
CCHCR1
PSME1
STIL
IL20RA
SYNJ1
HMBS
PRNP
SPON1
EFHD2
SCYL2
TMEFF2
MARVELD2
NAT2
ABCE1
PPP1R14D
ALOX5
LPIN2
FAHD1
PIWIL4
RACGAP1
CCND2
ITPR3
ADCK5
SELP
AMD1
GSR
DENND4C
RAD51
GNAI1
CFTR
AURKA
CENPL
PJA1
BNC2
CDC42BPG
SSB
UBE2T
KBTBD11
NXN
TSC22D3
CHDH
CENPO
G3BP1
KIF14
BATF
SCARF2
TTC12
DTL
CNPY4
PRSS2
YARS2
FLNA
HOOK2
TFAP4
LMNB2
CDC7
HES2
GJC1
SCO1
EMILIN1
KCNK9
HAPLN1
MEOX2
CCAR1
CCNB2
NAB2
NISCH
NIP7
MRPS36
SLC27A2
CFL2
ARID3A
GAD1
PLA2G6
TMEM121
RNASET2
EPM2AIP1
CDC42EP3
C11orf54
ZMYM1
SETX
PCNA
UTP15
HPDL
IYD
PRR5
PLEKHA7
NAGS
UCHL5
ATP1B1
TNFRSF11A
LY75
C15orf48
MRPL42
KCNJ13
CBLL1
HABP4
WDR13
RAMP2
KIF21B
ZNF189
PEX11G
NOG
VSTM2L
COX7A1
EID1
PRAP1
PGM2
SMARCA1
EFNB1
CYB5A
MSRB3
MEF2A
CRLF1
MYOZ3
WDR12
ATXN7
AURKB
NUP37
GALE
CPS1
RSPO3
GPX3
GAS2L3
RGL1
CCDC68
HNRNPH2
PLEKHG6
LRRC40
GGH
PTPN9
BUB3
NOC3L
ELF3
TMEM139
GPX4
SLA2
HARS2
SOX6
PAICS
SPRY2
SLC17A4
PCDHB2
UTP6
NDN
PDLIM3
CENPH
KIF18B
MITF
MYO19
LAIR2
PAWR
XK
ZBTB7B
VCL
FUCA1
WDFY1
PLK4
BRI3BP
GRHL2
CEACAM8
PPIG
KLF9
FUT3
CYB5B
UST
WFS1
PTP4A2
LGALS9
PKD2L1
AKR7A2
MARK2
GTPBP1
SGK2
SUCLG1
IL12RB1
ITGB5
SEMA3A
ARHGAP12
DLAT
UBE2C
ARPC5
CMTM4
RASL12
PGGT1B
MTMR14
SLC25A10
ADNP2
SLC24A3
HEY2
CDC123
DONSON
GRTP1
DHX15
YWHAB
SFXN5
ERBB3
RASL11A
AMN
ANKRD22
MITD1
VBP1
STYK1
PPP2R5D
NHLRC2
ACSS2
CLCN1
TULP3
HDAC11
PCDHB4
RAB2B
SMPD2
USP11
PLAT
ERMP1
CTNNAL1
PSMA4
GLS
HLA-G
PCDHB12
NPM1
ANGPT1
HSD11B2
ERCC6L
TPPP
CD3D
ENTPD7
GLB1L2
CDKN2AIP
LRFN5
DDX20
PNMA1
WDR38
ATP2C2
TCEAL7
MAPK6
NUP50
GTSE1
SLC31A1
CEP152
DSCC1
MTTP
PEBP1
TRIM6
C1QBP
CCT6A
GADD45A
RETSAT
WDR43
SEC16B
HMMR
CYP2R1
BCAN
ARMCX3
MTHFR
OIP5
SULT1A1
CYP2W1
NAV1
IL27
TRIM26
RRAGA
PTPRZ1
VPS33B
PPP6C
PPARG
DES
COL8A2
KPNA3
DSN1
PDZK1
MSH2
OLFML2A
C21orf58
SEH1L
DGAT1
THRA
ABCA9
PLA2G5
SEMA6D
MIA2
CYCS
LDB2
PPAT
CA3
CDH16
SH3BP2
NRF1
TSTA3
XRN1
SLC22A18AS
TRMT6
SCN5A
TMEM120A
PFKL
MTX3
ECM2
PARP4
FABP1
SERINC5
SPATS1
MID1
KCTD15
KIR2DL1
CHCHD7
FTO
BCL2L14
CAPZA1
ZSWIM5
SVEP1
CYP3A4
MAPKAPK5
CDH24
ARMCX1
NUDT19
KRCC1
TWF1
GRSF1
SLC19A1
ZNF700
LRCH2
USP28
IGF1
RPS7
SFXN2
CDC42SE2
PTGER2
CEBPE
TOP2A
RRAD
CES3
ERLIN1
TMEM62
TRUB1
RAD51AP1
CD244
MACROD1
PEPD
CCNB1
MYL6B
DMPK
NRARP
TELO2
VRK1
KLK15
SAMD1
CISH
MOCOS
TMEM185A
SOX2
SLC5A9
CPA3
FAM110B
HSPD1
STAG2
ACAT2
NCOA5
IRF6
SCG2
RNF180
KISS1
HNRNPC
NCAPG
B3GNT3
KHDRBS1
NUP35
SORBS1
PTPN13
HAL
BLM
EML1
IKBKE
CST6
PSG4
MAT2B
MRM1
CNTNAP1
TMEM47
CSTF2
NPDC1
ZNF169
ZNF213
ABCB10
HMGB2
TMEM116
PLAC8L1
DZIP1
ADH6
ZNF770
NKIRAS1
BTBD8
BTF3L4
ACMSD
RPIA
TATDN1
HNRNPF
PPID
MPND
FZD2
MRPL35
PAK1IP1
USP13
GTPBP4
CACYBP
FAM111A
ZNF484
